# Supplementary material for: Variations in the structural composition of pyrazole-3,5-dicarboxylato Cu(ii) complexes with 1,2-di(4-pyridyl)ethane synthesized under different conditions
Source: Royal Society of Chemistry journal article supplement (doi:10.1039/d3ce00384a), 2023-01-01
Supplement: d3ce00384a1.pdf [file d3ce00384a1.pdf]

## Electronic Supplementary Information

### Variations in the structural composition of pyrazole-3,5-dicarboxylato Cu(II) complexes with 1,2-di(4-pyridyl)ethane synthesized under different conditions

Fatima Klongdee,<sup>a</sup> Kittipong Chainok,<sup>b</sup> Sujittra Youngme<sup>a</sup> and Jaurusup Boonmak<sup>a\*</sup>

<sup>a</sup>Materials Chemistry Research Center, Faculty of Science, Khon Kaen University, Khon Kaen, 40002, Thailand.

<sup>b</sup>Materials and Textiles Technology, Faculty of Science and Technology, Thammasat University, Pathum Thani, 12120, Thailand.

\*E-mails: [jaurusup@kku.ac.th](mailto:jaurusup@kku.ac.th)

**Table S1.** The selected bond lengths (Å) and angles (°) for complexes **1-6**.

| Complex 1 <sup>a</sup> |            |                                      |            |
|------------------------|------------|--------------------------------------|------------|
| Cu1—N3                 | 1.932(2)   | O1—Cu1—O5                            | 102.13(6)  |
| Cu1—N1                 | 1.942(2)   | N3—Cu1—O9                            | 103.42(7)  |
| Cu1—O1                 | 2.002(2)   | N1—Cu1—O9                            | 107.20(7)  |
| Cu1—O5                 | 2.020(2)   | O1—Cu1—O9                            | 91.04(7)   |
| Cu1—O9                 | 2.265 (2)  | O5—Cu1—O9                            | 89.83(7)   |
| Cu2—N2                 | 1.925(2)   | N2—Cu2—N4                            | 93.90(7)   |
| Cu2—N4                 | 1.931(2)   | N2—Cu2—O7                            | 165.83(8)  |
| Cu2—O7                 | 1.981 (2)  | N4—Cu2—O7                            | 80.71(7)   |
| Cu2—O3                 | 2.008(2)   | N2—Cu2—O3                            | 80.24(7)   |
| Cu2—O10                | 2.300(2)   | N4—Cu2—O3                            | 162.24(8)  |
| N3—Cu1—N1              | 93.53(7)   | O7—Cu2—O3                            | 100.96(6)  |
| N3—Cu1—O1              | 165.44(7)  | N2—Cu2—O10                           | 98.85(7)   |
| N1—Cu1—O1              | 80.31(7)   | N4—Cu2—O10                           | 108.58(7)  |
| N3—Cu1—O5              | 79.96(7)   | O7—Cu2—O10                           | 95.30(7)   |
| N1—Cu1—O5              | 162.82(7)  | O3—Cu2—O10                           | 88.95(7)   |
| Complex 2 <sup>b</sup> |            |                                      |            |
| Cu1—N1                 | 1.934(3)   | O1—Cu1—O5                            | 104.39(11) |
| Cu1—N3                 | 1.935(3)   | N1—Cu1—O14                           | 105.56(14) |
| Cu1—O1                 | 2.043(3)   | N3—Cu1—O14                           | 102.99(14) |
| Cu1—O5                 | 2.053(3)   | O1—Cu1—O14                           | 93.06(13)  |
| Cu1—O14                | 2.165(4)   | O5—Cu1—O14                           | 91.06(13)  |
| Cu2—N4                 | 1.922(3)   | N4—Cu2—N2                            | 91.96(13)  |
| Cu2—N2                 | 1.929(3)   | N4—Cu2—O3                            | 165.48(13) |
| Cu2—O3                 | 1.991(3)   | N2—Cu2—O3                            | 80.52(12)  |
| Cu2—O7                 | 2.018(3)   | N4—Cu2—O7                            | 80.86(12)  |
| Cu2—O13                | 2.303(3)   | N2—Cu2—O7                            | 161.84(14) |
| N1—Cu1—N3              | 92.70(13)  | O3—Cu2—O7                            | 102.56(11) |
| N1—Cu1—O1              | 79.29(12)  | N4—Cu2—O13                           | 104.85(12) |
| N3—Cu1—O1              | 163.54(14) | N2—Cu2—O13                           | 108.12(12) |
| N1—Cu1—O5              | 162.87(13) | O3—Cu2—O13                           | 89.35(11)  |
| N3—Cu1—O5              | 79.26(12)  | O7—Cu2—O13                           | 89.88(10)  |
| Complex 3 <sup>c</sup> |            |                                      |            |
| Cu1—N3                 | 1.970(3)   | N1—Cu1—O5                            | 98.83(13)  |
| Cu1—N1                 | 1.981(3)   | O1—Cu1—O5                            | 159.95(14) |
| Cu1—O1                 | 2.001(3)   | N3—Cu1—O6                            | 102.51(14) |
| Cu1—O5                 | 2.003(3)   | N1—Cu1—O6                            | 93.45(14)  |
| Cu1—O6                 | 2.214(3)   | O1—Cu1—O6                            | 110.05(14) |
| Cu2—O3 <sup>i</sup>    | 1.934(3)   | O5—Cu1—O6                            | 89.94(14)  |
| Cu2—O3                 | 1.934(3)   | O3 <sup>i</sup> —Cu2—O3              | 180.000    |
| Cu2—N2 <sup>i</sup>    | 1.973(3)   | O3 <sup>i</sup> —Cu2—N2 <sup>i</sup> | 82.99(13)  |
| Cu2—N2                 | 1.973(3)   | O3—Cu2—N2 <sup>i</sup>               | 97.01(13)  |
| N3—Cu1—N1              | 162.76(14) | O3 <sup>i</sup> —Cu2—N2              | 97.01(13)  |
| N3—Cu1—O1              | 86.37(13)  | O3—Cu2—N2                            | 82.99(13)  |
| N1—Cu1—O1              | 82.01(12)  | N2 <sup>i</sup> —Cu2—N2              | 180.00(13) |
| N3—Cu1—O5              | 87.80(13)  |                                      |            |

**Table S1.** The selected bond lengths (Å) and angles (°) for complexes **1-6** (Cont.).

| Complex 4 <sup>d</sup> |            |                        |            |
|------------------------|------------|------------------------|------------|
| Cu1—N1                 | 1.923(3)   | N3—Cu1—N6              | 108.22(13) |
| Cu1—N3                 | 1.935(3)   | O5—Cu1—N6              | 93.60(11)  |
| Cu1—O5                 | 1.990(3)   | O1—Cu1—N6              | 77.52(11)  |
| Cu1—O1                 | 2.050(3)   | N1—Cu1—O13             | 92.75(12)  |
| Cu1—O13                | 2.703(4)   | N3—Cu1—O13             | 96.50(12)  |
| Cu1—N6                 | 2.641(3)   | O5—Cu1—O13             | 81.59(11)  |
| Cu2—N4                 | 1.916(3)   | O1—Cu1—O13             | 78.95(10)  |
| Cu2—N2                 | 1.916(3)   | N6—Cu1—O13             | 153.62(9)  |
| Cu2—O7                 | 1.995(3)   | N4—Cu2—N2              | 94.40(13)  |
| Cu2—O3                 | 1.997(3)   | N4—Cu2—O7              | 80.41(12)  |
| Cu2—O7 <sup>i</sup>    | 2.417(3)   | N2—Cu2—O7              | 170.60(13) |
| N1—Cu1—N3              | 94.12(13)  | N4—Cu2—O3              | 166.02(13) |
| N1—Cu1—O5              | 171.15(13) | N2—Cu2—O3              | 80.36(11)  |
| N3—Cu1—O5              | 79.86(12)  | O7—Cu2—O3              | 102.87(11) |
| N1—Cu1—O1              | 79.31(11)  | N4—Cu2—O7 <sup>i</sup> | 103.62(12) |
| N3—Cu1—O1              | 171.74(12) | N2—Cu2—O7 <sup>i</sup> | 106.11(12) |
| O5—Cu1—O1              | 106.06(10) | O7—Cu2—O7 <sup>i</sup> | 82.83(11)  |
| N1—Cu1—N6              | 94.45(12)  | O3—Cu2—O7 <sup>i</sup> | 90.3(1)    |
| Complex 5 <sup>e</sup> |            |                        |            |
| Cu1—N3                 | 1.920(3)   | N3—Cu1—O1              | 166.76(13) |
| Cu1—N1                 | 1.935(3)   | N1—Cu1—O1              | 80.13(12)  |
| Cu1—O1                 | 2.002(3)   | N3—Cu1—O5              | 80.28(11)  |
| Cu1—O5                 | 2.004(3)   | N1—Cu1—O5              | 168.09(12) |
| Cu1—N9                 | 2.330(3)   | O1—Cu1—O5              | 104.85(11) |
| Cu2—N4                 | 1.922(3)   | N3—Cu1—N9              | 93.78(13)  |
| Cu2—N2                 | 1.934(3)   | N1—Cu1—N9              | 90.99(12)  |
| Cu2—O7                 | 2.018(3)   | O1—Cu1—N9              | 97.38(12)  |
| Cu2—O3                 | 2.056(3)   | O5—Cu1—N9              | 98.96(12)  |
| Cu2—N11                | 2.325(3)   | N4—Cu2—N2              | 92.92(12)  |
| Cu3—N5                 | 1.925(3)   | N4—Cu2—O7              | 80.01(11)  |
| Cu3—N7                 | 1.936(3)   | N2—Cu2—O7              | 166.54(13) |
| Cu3—O13                | 2.010(3)   | N4—Cu2—O3              | 166.93(13) |
| Cu3—O9                 | 2.018(3)   | N2—Cu2—O3              | 78.92(11)  |
| Cu3—N12                | 2.251(3)   | O7—Cu2—O3              | 105.79(11) |
| Cu4—N6                 | 1.921(3)   | N4—Cu2—N11             | 102.83(13) |
| Cu4—N8                 | 1.929(3)   | N2—Cu2—N11             | 102.67(12) |
| Cu4—O11                | 2.022(3)   | O7—Cu2—N11             | 90.13(11)  |
| Cu4—O15                | 2.063(3)   | O3—Cu2—N11             | 89.01(11)  |
| Cu4—N10                | 2.213(3)   | N5—Cu3—N7              | 92.28(13)  |
| N3—Cu1—N1              | 92.62(12)  | N5—Cu3—O13             | 162.97(14) |
| N7—Cu3—O13             | 79.80(12)  | N6—Cu4—O11             | 79.96(12)  |
| N5—Cu3—O9              | 79.71(11)  | N8—Cu4—O11             | 161.73(13) |
| N7—Cu3—O9              | 162.13(14) | N6—Cu4—O15             | 164.16(13) |
| O13—Cu3—O9             | 103.42(11) | N8—Cu4—O15             | 78.79(12)  |
| N5—Cu3—N12             | 98.77(14)  | O11—Cu4—O15            | 104.21(11) |
| N7—Cu3—N12             | 97.33(14)  | N6—Cu4—N10             | 102.60(14) |
| O13—Cu3—N12            | 97.20(12)  | N8—Cu4—N10             | 101.54(13) |

**Table S1.** The selected bond lengths (Å) and angles (°) for complexes **1-6** (Cont.).

| Complex 5 <sup>e</sup> |           |                        |           |
|------------------------|-----------|------------------------|-----------|
| O9—Cu3—N12             | 99.65(12) | O11—Cu4—N10            | 96.37(12) |
| N6—Cu4—N8              | 92.59(13) | O15—Cu4—N10            | 92.21(12) |
| Complex 6 <sup>f</sup> |           |                        |           |
| Cu1—N1                 | 1.912(6)  | O5—Cu1—O1              | 102.5(2)  |
| Cu1—N3                 | 1.931(6)  | O5—Cu1—O1 <sup>i</sup> | 84.5(2)   |
| Cu1—O1                 | 2.016(5)  | O1—Cu1—O1 <sup>i</sup> | 81.0(2)   |
| Cu1—O5                 | 1.982(5)  | N3—Cu1—O1 <sup>i</sup> | 110.3(2)  |
| Cu1—O1 <sup>i</sup>    | 2.452(5)  | N1—Cu1—O1 <sup>i</sup> | 109.5(2)  |
| Cu2—N4                 | 1.922(6)  | N2—Cu2—N4              | 93.9(3)   |
| Cu2—N2                 | 1.920(6)  | N2—Cu2—O3              | 81.2(2)   |
| Cu2—O7                 | 2.037(5)  | N4—Cu2—O3              | 165.7(2)  |
| Cu2—O3                 | 1.976(5)  | N2—Cu2—O7              | 163.9(2)  |
| Cu2—O2 <sup>ii</sup>   | 2.279(5)  | N4—Cu2—O7              | 78.7(2)   |
| N1—Cu1—N3              | 93.8(3)   | O3—Cu2—O7              | 102.5(2)  |
| N1—Cu1—O5              | 165.9(2)  | N2—Cu2—O2 <sup>i</sup> | 104.3(2)  |
| N3—Cu1—O5              | 80.9(2)   | N4—Cu2—O2 <sup>i</sup> | 99.2(2)   |
| N1—Cu1—O1              | 80.4(2)   | O3—Cu2—O2 <sup>i</sup> | 95.1(2)   |
| N3—Cu1—O1              | 168.6(2)  | O7—Cu2—O2 <sup>i</sup> | 91.00(19) |

<sup>e</sup>Symmetry codes for **3**: (i) -x, 1-y, 1-z; (ii) 2-x, 1-y, 2-z. <sup>d</sup>For **4**: (i) 1-x, 1-y, 1-z; (ii) 1+x, y, z. <sup>f</sup>For **6**: (i) 1-x, 1-y, 1-z; (ii) -1+x, y, z.

**Table S2.** Intermolecular hydrogen bond length/Å angles/° in complexes **1-6**.

| Complex 1 <sup>a</sup>       |          |            |            |          |
|------------------------------|----------|------------|------------|----------|
| D—H...A                      | d(D—H)/Å | d(H...A)/Å | d(D...A)/Å | <(DHA)/° |
| O9—H1...O4 <sup>i</sup>      | 0.85     | 1.95       | 2.782(2)   | 167      |
| O9—H2...O16 <sup>ii</sup>    | 0.84     | 2.01       | 2.809(3)   | 156      |
| O10—H4...O6 <sup>iii</sup>   | 0.85     | 1.99       | 2.843(3)   | 175      |
| N5—H5...O4 <sup>iv</sup>     | 0.86     | 1.97       | 2.829(3)   | 174      |
| N6—H6...O6 <sup>v</sup>      | 0.86     | 1.97       | 2.820(3)   | 171      |
| O10—H7...O12                 | 0.84     | 2.18       | 2.896(3)   | 143      |
| O11—H23...O2                 | 0.85     | 1.87       | 2.717(3)   | 175      |
| O11—H24...O12 <sup>vi</sup>  | 0.85     | 2.06       | 2.898(3)   | 168      |
| O12—H25...O13                | 0.85     | 1.91       | 2.725(3)   | 162      |
| O12—H26...O14 <sup>i</sup>   | 0.85     | 1.93       | 2.766(3)   | 169      |
| O13—H27...O7                 | 0.84     | 1.99       | 2.781(3)   | 156      |
| O13—H28...O11 <sup>vii</sup> | 0.85     | 2.11       | 2.919(3)   | 160      |
| O14—H29...O2 <sup>viii</sup> | 0.84     | 2.12       | 2.813(3)   | 140      |
| O14—H30...O8 <sup>v</sup>    | 0.84     | 1.89       | 2.713(3)   | 166      |
| O15—H31...O1 <sup>v</sup>    | 0.84     | 2.02       | 2.797(3)   | 153      |
| O15—H32...O14 <sup>iv</sup>  | 0.84     | 1.98       | 2.806(3)   | 168      |
| O16—H33...O11 <sup>iii</sup> | 0.85     | 1.99       | 2.833(3)   | 173      |
| O16—H34...O15                | 0.85     | 1.89       | 2.711(3)   | 164      |
| C11—H11...O3 <sup>iv</sup>   | 0.93     | 2.43       | 3.025(3)   | 122      |
| C19—H19...O16 <sup>i</sup>   | 0.93     | 2.58       | 3.467(3)   | 160      |
| C22—H22...O5 <sup>v</sup>    | 0.93     | 2.52       | 3.082(3)   | 120      |

**Table S2.** Intermolecular hydrogen bond length/Å angles/° in complexes **1-6** (Cont.).

| Complex 2 <sup>b</sup>        |          |            |            |          |
|-------------------------------|----------|------------|------------|----------|
| D-H...A                       | d(D-H)/Å | d(H...A)/Å | d(D...A)/Å | <(DHA)/° |
| O13-H1...O6 <sup>i</sup>      | 0.83     | 2.02       | 2.846(4)   | 170      |
| O13-H2...O2 <sup>ii</sup>     | 0.83     | 2.02       | 2.808(4)   | 159      |
| O14-H4...O8 <sup>i</sup>      | 0.82     | 2.00       | 2.722(5)   | 146      |
| N5-H5...O8                    | 0.86     | 1.81       | 2.663(5)   | 173      |
| N6-H6...O3 <sup>iii</sup>     | 0.86     | 2.11       | 2.841(7)   | 142      |
| N6-H6...O4 <sup>iii</sup>     | 0.86     | 2.09       | 2.888(6)   | 154      |
| O14-H7...O4 <sup>ii</sup>     | 0.83     | 1.87       | 2.688(5)   | 166      |
| O9-H9A...O2 <sup>iv</sup>     | 0.86     | 2.03       | 2.841(5)   | 156      |
| O9-H9B...O12 <sup>v</sup>     | 0.86     | 2.14       | 2.809(7)   | 135      |
| O10-H10A...O6 <sup>i</sup>    | 0.86     | 2.00       | 2.818(7)   | 159      |
| O10-H10B...O9 <sup>vi</sup>   | 0.86     | 2.16       | 2.830(7)   | 134      |
| O11-H11A...O10 <sup>vii</sup> | 0.86     | 2.15       | 2.789(7)   | 131      |
| O11-H11B...O5 <sup>viii</sup> | 0.86     | 2.06       | 2.820(5)   | 146      |
| O12-H12A...O1 <sup>viii</sup> | 0.86     | 2.03       | 2.816(6)   | 153      |
| O12-H12B...O11                | 0.86     | 2.07       | 2.811(7)   | 143      |
| C15-H15...O14 <sup>i</sup>    | 0.93     | 2.56       | 3.333(6)   | 140      |
| C21-H21...O11 <sup>ix</sup>   | 0.93     | 2.55       | 3.452(8)   | 165      |
| Complex 3 <sup>c</sup>        |          |            |            |          |
| D-H...A                       | d(D-H)/Å | d(H...A)/Å | d(D...A)/Å | <(DHA)/° |
| O5-H2...O1 <sup>i</sup>       | 0.85     | 2.23       | 3.048(5)   | 163      |
| O6-H4...O4 <sup>ii</sup>      | 0.86     | 2.04       | 2.857(5)   | 160      |
| O6-H5...O2 <sup>iii</sup>     | 0.85     | 2.16       | 2.939(5)   | 153      |
| C6-H6...O4 <sup>ii</sup>      | 0.93     | 2.48       | 3.385(5)   | 163      |
| C10-H10...O4 <sup>iv</sup>    | 0.93     | 2.38       | 3.297(5)   | 168      |
| Complex 4 <sup>d</sup>        |          |            |            |          |
| D-H...A                       | D-H...A  | D-H...A    | D-H...A    | D-H...A  |
| O13-H1...O6 <sup>i</sup>      | 0.86     | 1.99       | 2.843(4)   | 171      |
| O13-H2...O2 <sup>ii</sup>     | 0.86     | 1.90       | 2.724(5)   | 161      |
| O14-H4...O9 <sup>i</sup>      | 0.86     | 1.96       | 2.754(6)   | 155      |
| N5-H5...O14 <sup>iii</sup>    | 0.86     | 1.86       | 2.692(6)   | 162      |
| O14-H6...O5 <sup>iv</sup>     | 0.85     | 1.88       | 2.625(6)   | 146      |
| N7-H7...O1 <sup>ii</sup>      | 0.86     | 2.19       | 2.920(7)   | 142      |
| N7-H7...O2 <sup>ii</sup>      | 0.86     | 2.10       | 2.887(8)   | 151      |
| N8-H8A...O3 <sup>v</sup>      | 0.86     | 1.89       | 2.747(6)   | 171      |
| O10-H10...O13 <sup>iii</sup>  | 0.82     | 1.80       | 2.605(5)   | 167      |
| C3-H3...O6 <sup>vi</sup>      | 0.93     | 2.47       | 3.390(4)   | 173      |
| C8-H8...O4 <sup>vii</sup>     | 0.93     | 2.54       | 3.398(5)   | 153      |
| C16-H16...O10 <sup>iv</sup>   | 0.93     | 2.47       | 3.337(9)   | 155      |
| C20-H20...O14 <sup>viii</sup> | 0.93     | 2.58       | 3.297(10)  | 134      |
| C21-H21A...O14 <sup>vi</sup>  | 0.97     | 2.48       | 3.387(12)  | 155      |
| Complex 5 <sup>e</sup>        |          |            |            |          |
| D-H...A                       | d(D-H)/Å | d(H...A)/Å | d(D...A)/Å | <(DHA)/° |
| N13-H13A...O9 <sup>i</sup>    | 1.01     | 2.53       | 3.286(5)   | 132      |
| N13-H13A...O10 <sup>i</sup>   | 1.01     | 1.83       | 2.787(6)   | 158      |
| N13-H13B...O5 <sup>ii</sup>   | 0.95     | 2.43       | 3.230      | 142      |

**Table S2.** Intermolecular hydrogen bond length/Å angles/° in complexes **1-6** (Cont.).

| Complex 5 <sup>e</sup>        |          |            |            |          |
|-------------------------------|----------|------------|------------|----------|
| D-H...A                       | d(D-H)/Å | d(H...A)/Å | d(D...A)/Å | <(DHA)/° |
| N13-H13B...O6 <sup>ii</sup>   | 0.95     | 1.97       | 2.836      | 151      |
| N14-H14A...O14 <sup>iii</sup> | 0.92     | 1.99       | 2.843      | 153      |
| N14-H14B...O1                 | 1.04     | 2.36       | 3.120      | 130      |
| N14-H14B...O2                 | 1.04     | 1.97       | 2.885      | 145      |
| N15-H15A...O12 <sup>iv</sup>  | 0.90     | 1.87       | 2.734(5)   | 160      |
| N15-H15B...O8 <sup>v</sup>    | 0.95     | 1.80       | 2.728      | 165      |
| N16-H16A...O15 <sup>iii</sup> | 0.94     | 1.87       | 2.791      | 166      |
| N16-H16B...O3 <sup>vi</sup>   | 0.91     | 1.92       | 2.808      | 168      |
| C22-H22...O16 <sup>i</sup>    | 0.93     | 2.40       | 3.320(5)   | 168      |
| C31-H31...O2 <sup>vii</sup>   | 0.93     | 2.50       | 3.380(7)   | 158      |
| C34-H34...O4 <sup>viii</sup>  | 0.93     | 2.44       | 3.201(6)   | 139      |
| C36-H36...O6 <sup>ix</sup>    | 0.93     | 2.52       | 3.257(5)   | 136      |
| C45-H45A...O16 <sup>x</sup>   | 0.96     | 2.30       | 3.233(8)   | 164      |
| C45-H45C...O4 <sup>xi</sup>   | 0.96     | 2.43       | 3.368(7)   | 166      |
| C46-H46A...O3 <sup>xi</sup>   | 0.96     | 2.52       | 3.414(7)   | 154      |
| C46-H46C...O15 <sup>x</sup>   | 0.96     | 2.52       | 3.404(8)   | 154      |
| C47-H47A...O12 <sup>xii</sup> | 0.96     | 2.57       | 3.463(6)   | 154      |
| C49-H49A...O10 <sup>i</sup>   | 0.96     | 2.60       | 3.495(6)   | 155      |
| C49-H49C...O6 <sup>ii</sup>   | 0.96     | 2.50       | 3.418(6)   | 160      |
| C50-H50C...O9 <sup>i</sup>    | 0.96     | 2.57       | 3.513(5)   | 167      |
| Complex 6 <sup>f</sup>        |          |            |            |          |
| D-H...A                       | d(D-H)/Å | d(H...A)/Å | d(D...A)/Å | <(DHA)/° |
| N5-H5...O7 <sup>i</sup>       | 0.86     | 1.80       | 2.641(9)   | 165      |
| N6-H6...O6 <sup>ii</sup>      | 0.86     | 1.91       | 2.761(8)   | 173      |
| C8-H8...O6 <sup>iii</sup>     | 0.93     | 2.55       | 3.476(9)   | 171      |
| C12-H12...O4 <sup>iv</sup>    | 0.93     | 2.60       | 3.424(10)  | 149      |
| C14-H14...O8 <sup>v</sup>     | 0.93     | 2.48       | 3.380(10)  | 164      |
| C16-H16B...O4 <sup>iv</sup>   | 0.97     | 2.56       | 3.346(10)  | 138      |
| C18-H18...O8 <sup>vi</sup>    | 0.93     | 2.21       | 3.136(10)  | 174      |
| C21-H21...O2 <sup>vii</sup>   | 0.93     | 2.39       | 3.271(9)   | 158      |

<sup>a</sup>Symmetry codes for **1**: (i) x, 0.5-y, 0.5+z; (ii) x, y, 1+z; (iii) x, 0.5-y, -0.5+z; (iv) 1+x, y, z; (v) x, y, -1+z; (vi) 1-x, 0.5+y, 1.5-z; (vii) -1+x, y, z; (viii) 1-x, 1-y, 1-z. <sup>b</sup>For **2**: (i) -x, 1-y, 1-z; (ii) 1-x, 2-y, 1-z; (iii) 2-x, 1-y, 2-z; (iv) x, -1+y, z; (v) 1-x, 1-y, -z; (vi) 1-x, 1-y, 1-z; (vii) x, y, -1+z; (viii) 1+x, y, z; (ix) 2-x, 1-y, 1-z. <sup>c</sup>For **3**: (i) 1-x, -0.5+y, 1.5-z; (ii) 1+x, y, z; (iii) x, 1.5-y, -0.5+z; (iv) -x, -0.5+y, 1.5-z. <sup>d</sup>For **4**: (i) 2-x, 2-y, 2-z; (ii) 2-x, 1-y, 2-z; (iii) 1+x, y, z; (iv) -1+x, y, z; (v) -x, -y, 1-z; (vi) x, -1+y, z; (vii) x, 1+y, z; (viii) 1-x, 1-y, 2-z. <sup>e</sup>For **5**: (i) 1+x, y, z; (ii) 1-x, 1-y, 1-z; (iii) -x, 1-y, 1-z; (iv) 1-x, -y, 1-z; (v) 1+x, y, -1+z; (vi) x, 1+y, -1+z; (vii) -1+x, y, z; (viii) 1-x, -y, 2-z; (ix) -x, 1-y, 2-z; (x) -x, -y, 1-z; (xi) x, y, -1+z; (xii) 1+x, 1+y, z. <sup>f</sup>For **6**: (i) 1+x, y, z; (ii) -1+x, 0.5-y, 0.5+z; (iii) -x, -y, 1-z; (iv) -x, -0.5+y, 1.5-z; (v) -x, 0.5+y, 1.5-z; (vi) -1-x, 0.5+y, 1.5-z; (vii) 1-x, -0.5+y, 1.5-z.

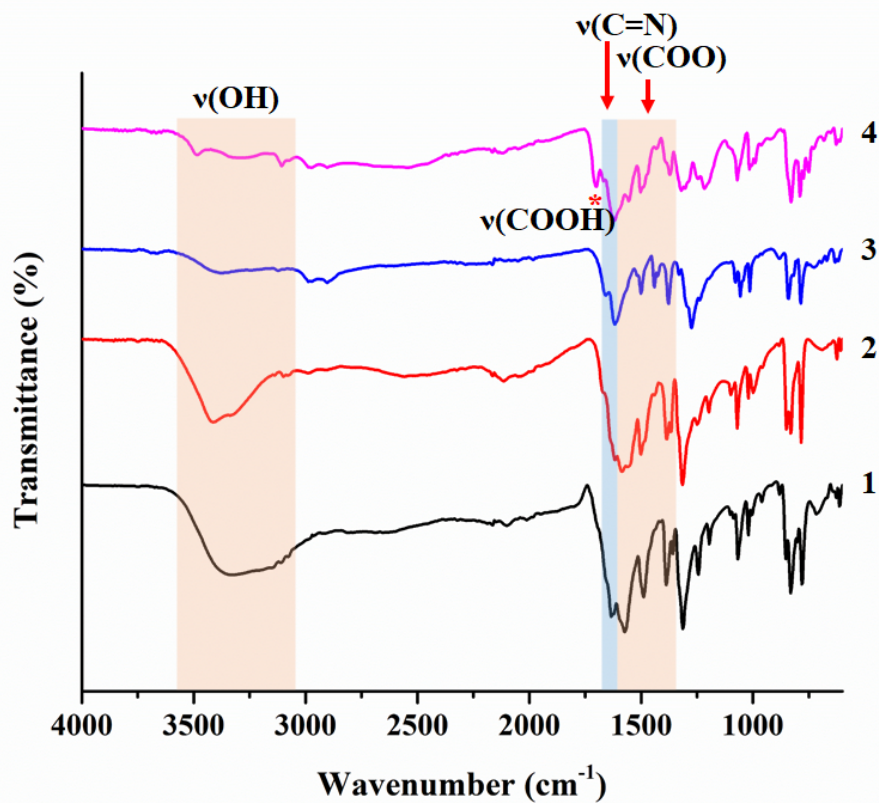

Figure S1. IR spectra of 1-4.

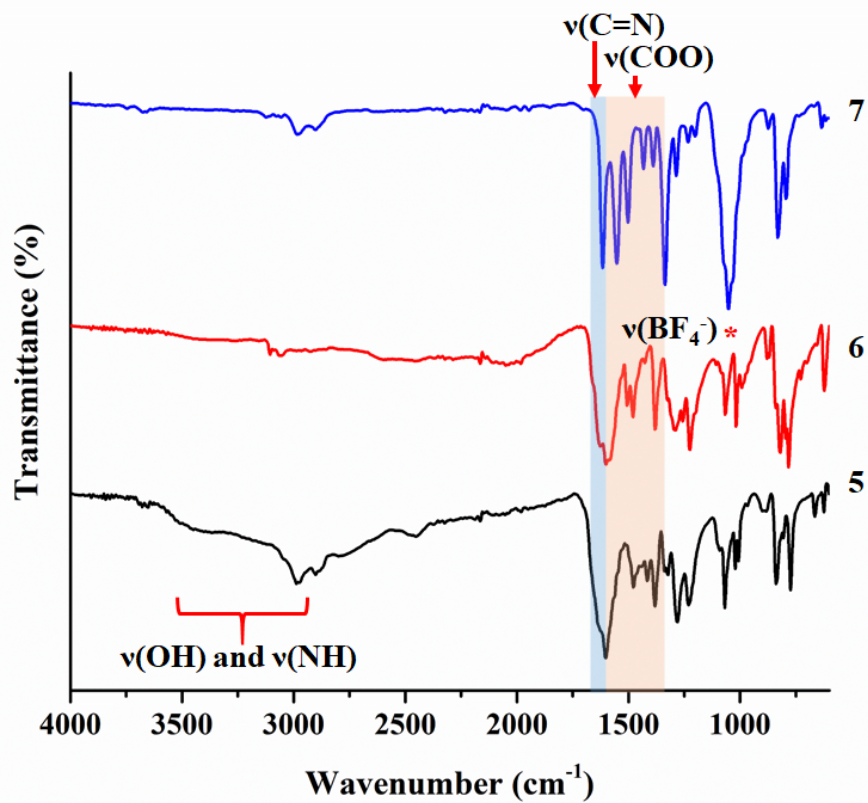

Figure S2. IR spectra of 5-7.

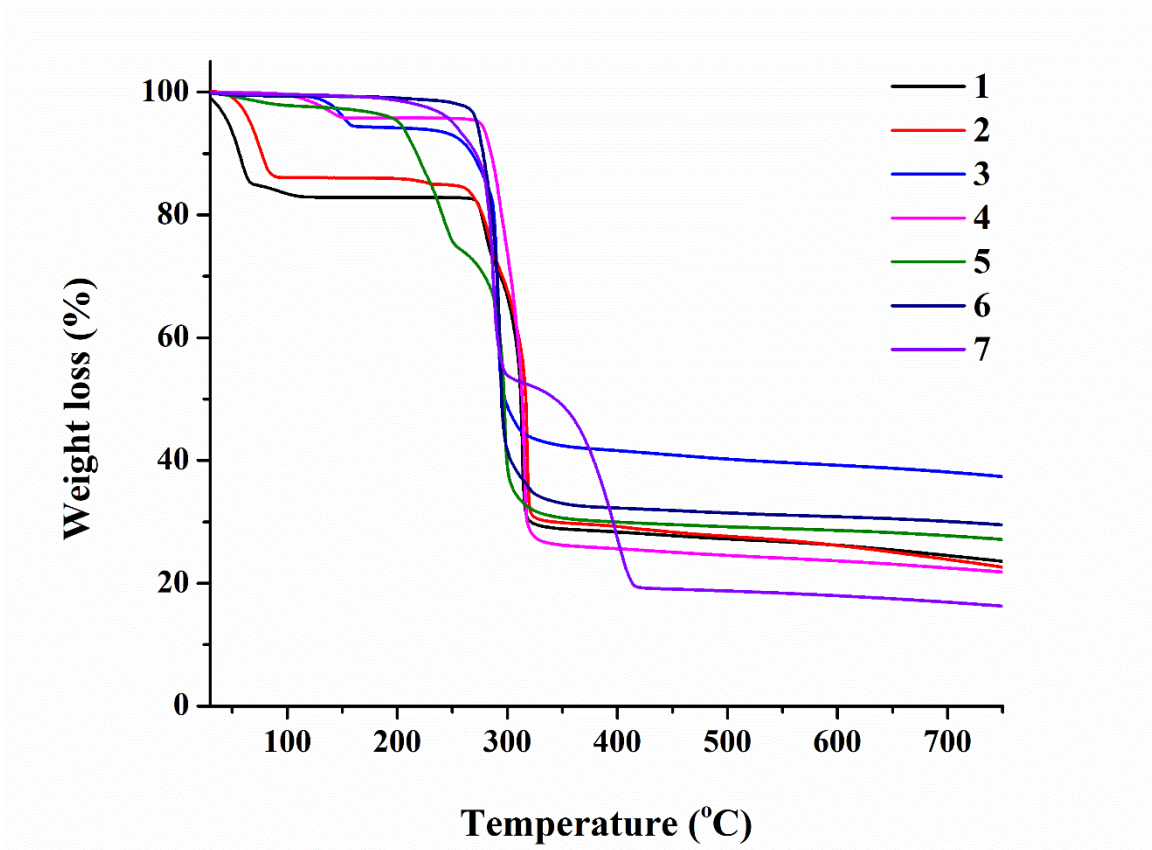

Figure S3. TG curves of 1-7.

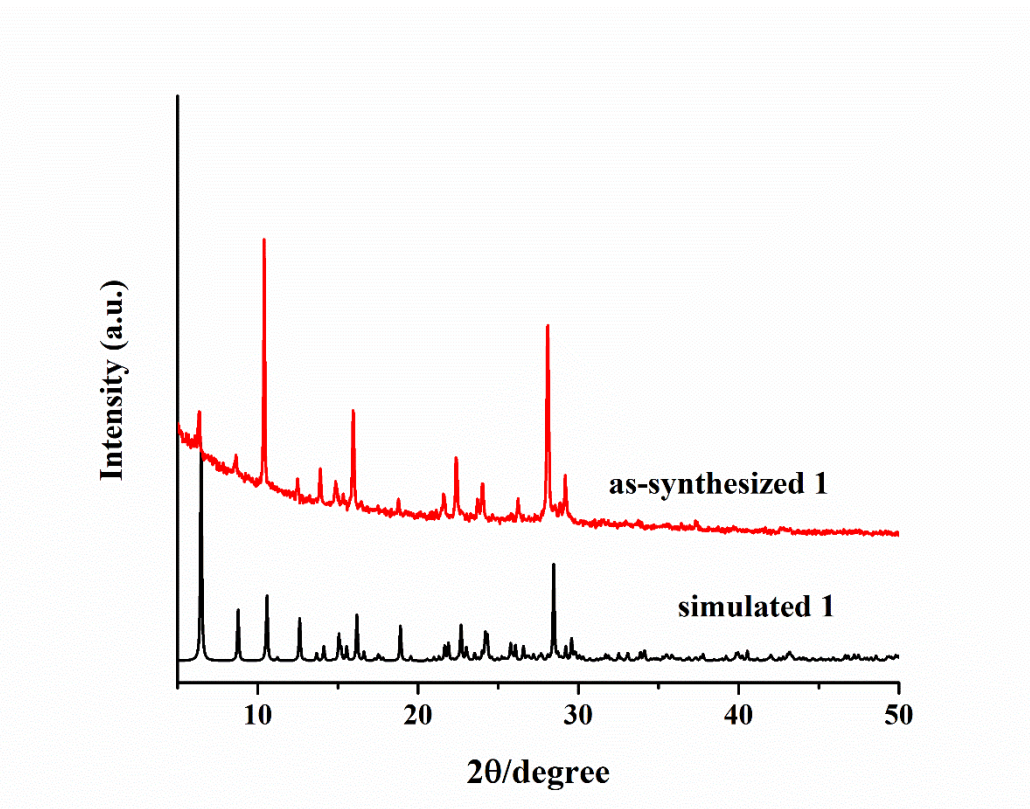

Figure S4. PXRD patterns of simulated from single-crystal XRD data and as-synthesized of 1.



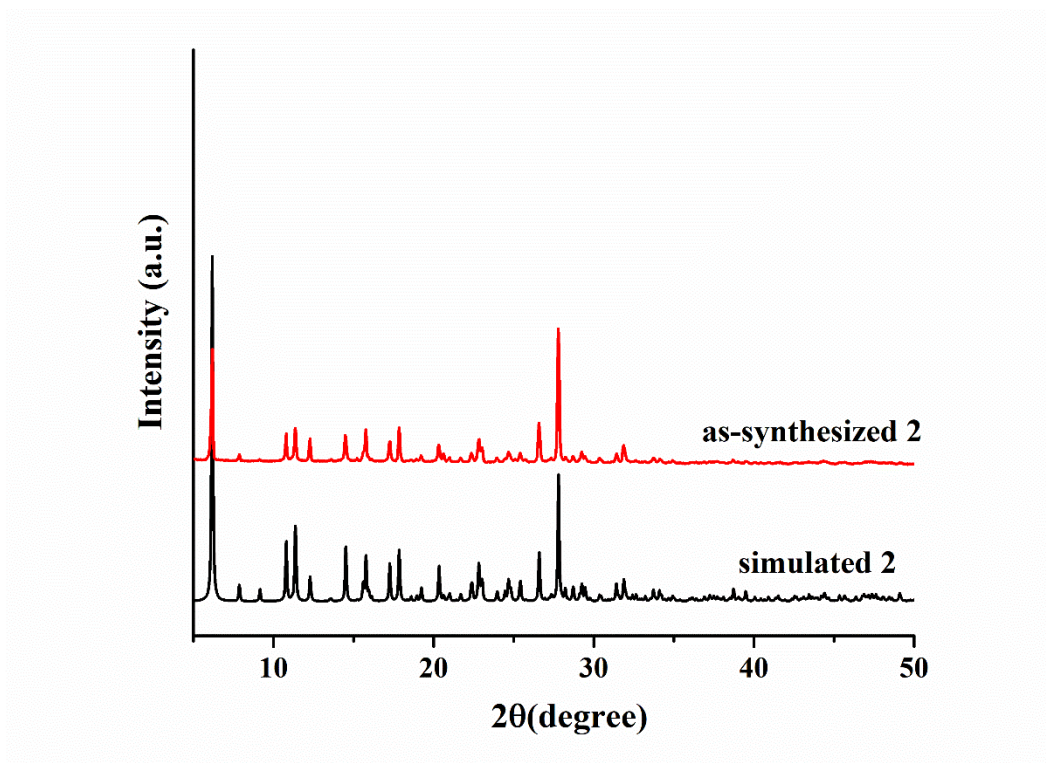

**Figure S5.** PXRD patterns of simulated from single-crystal XRD data and as-synthesized of **2**.

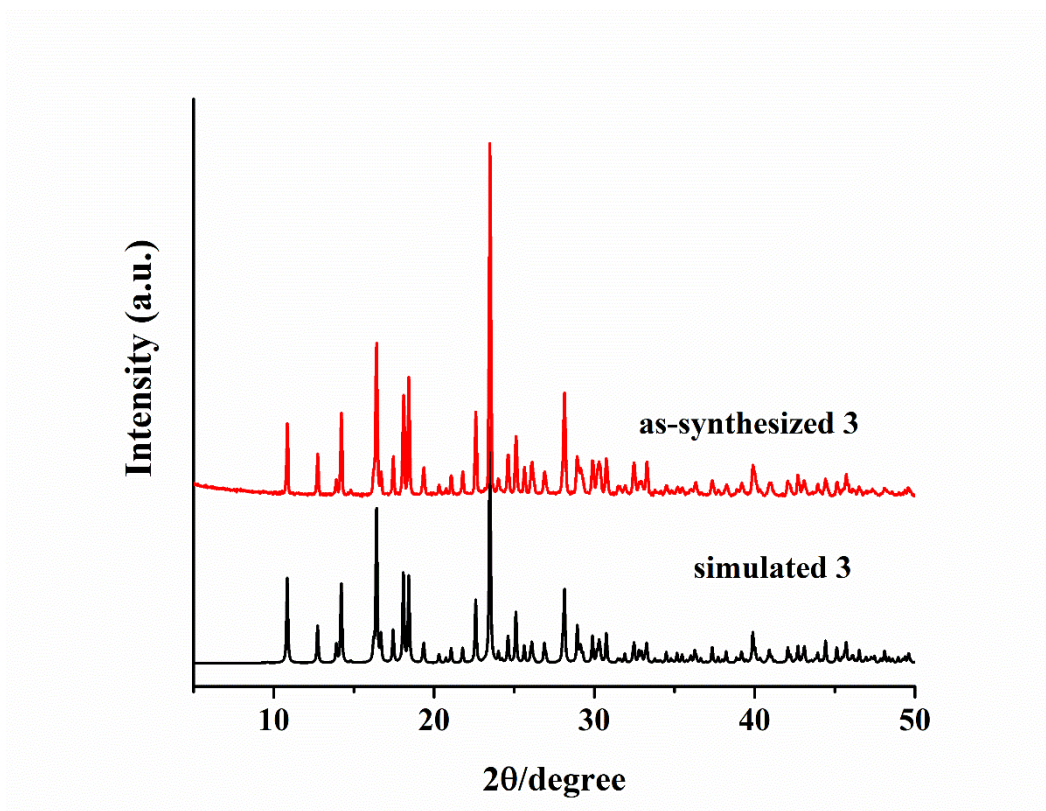

**Figure S6.** PXRD patterns of simulated from single-crystal XRD data and as-synthesized of **3**.

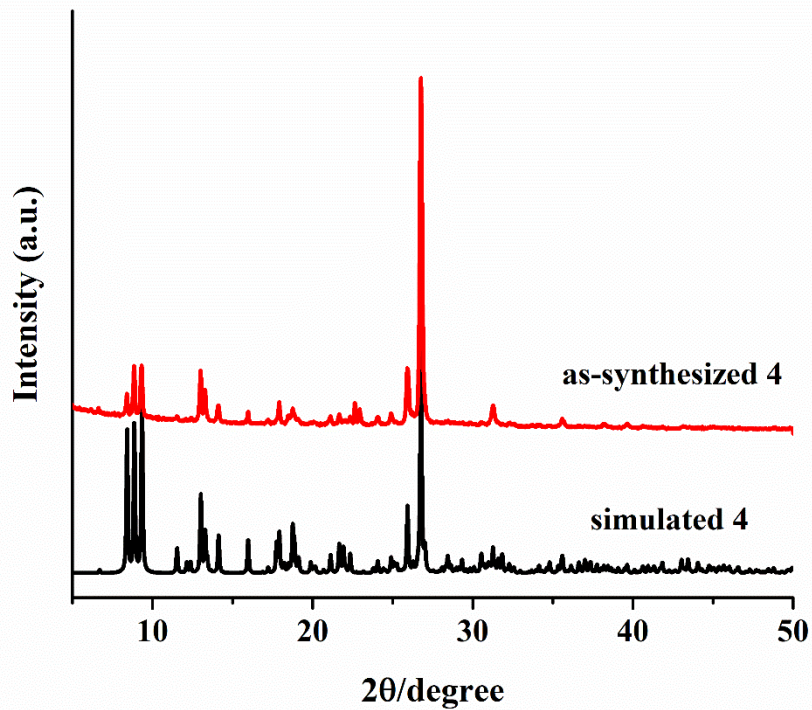

**Figure S7.** PXRD patterns of simulated from single-crystal XRD data and as-synthesized of **4**.

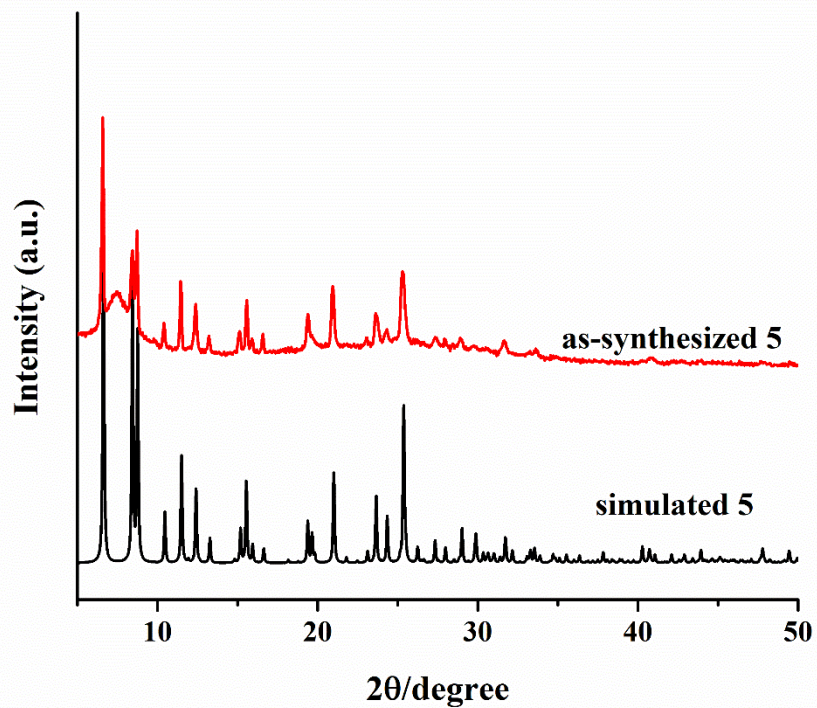

**Figure S8.** PXRD patterns of simulated from single-crystal XRD data and as-synthesized of **5**.

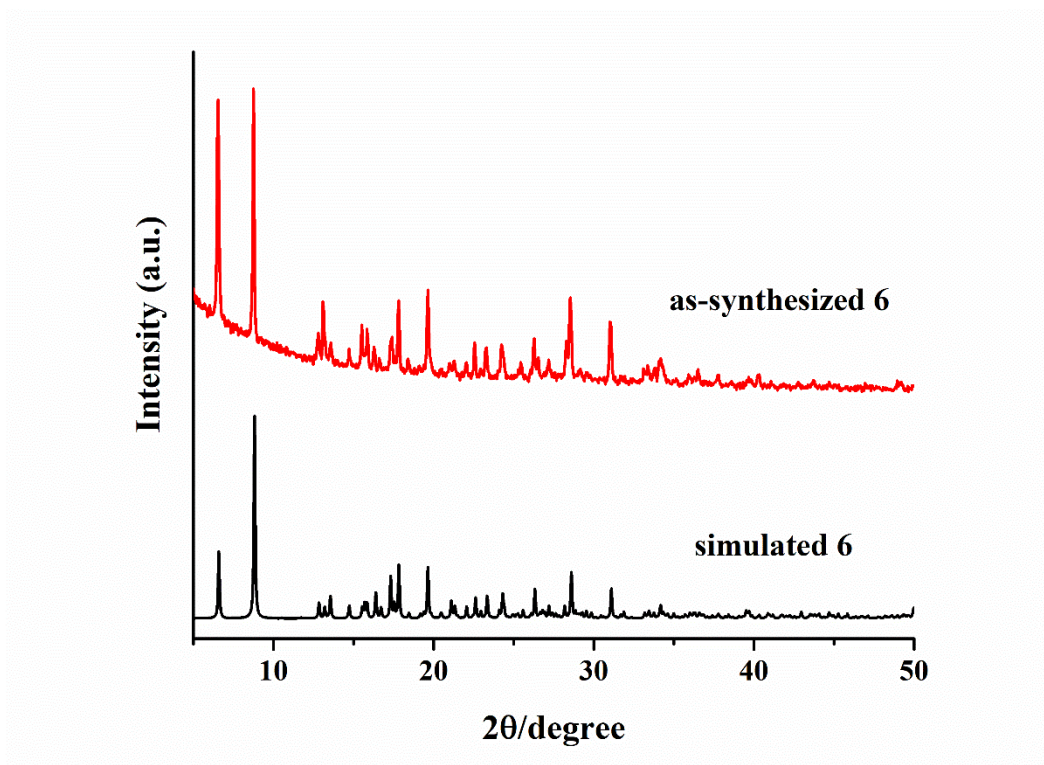

**Figure S9.** PXRD patterns of simulated from single-crystal XRD data and as-synthesized of **6**.

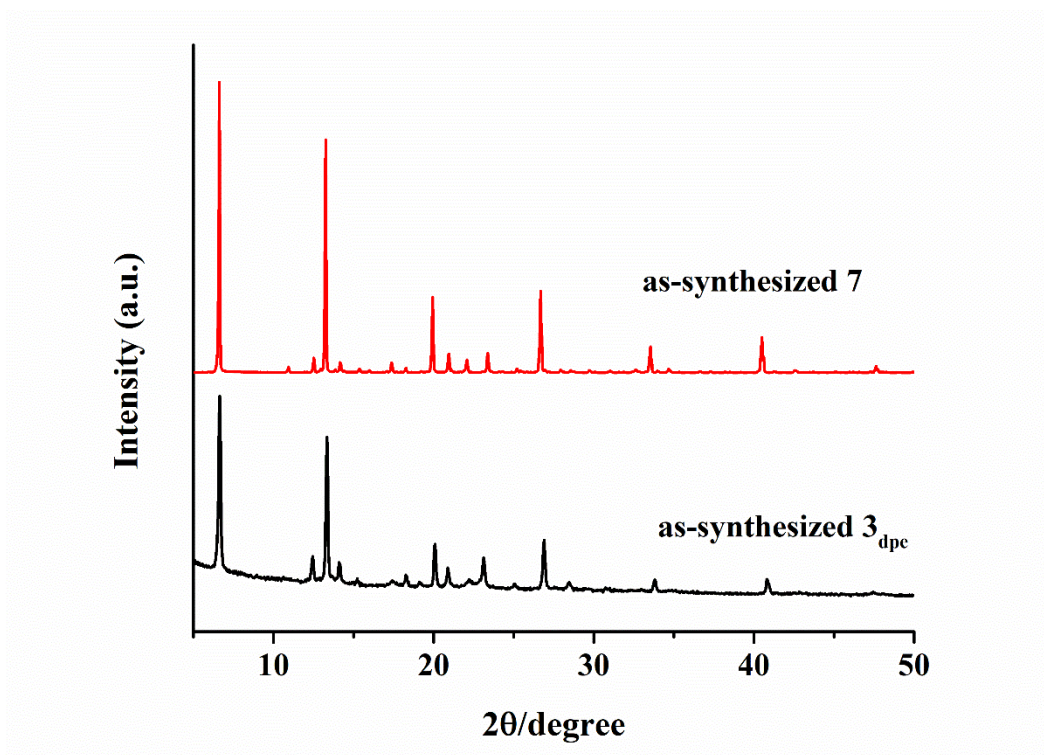

**Figure S10.** PXRD patterns of simulated from single-crystal XRD data of **3<sub>dpc</sub><sup>1</sup>** and as-synthesized of **7**.

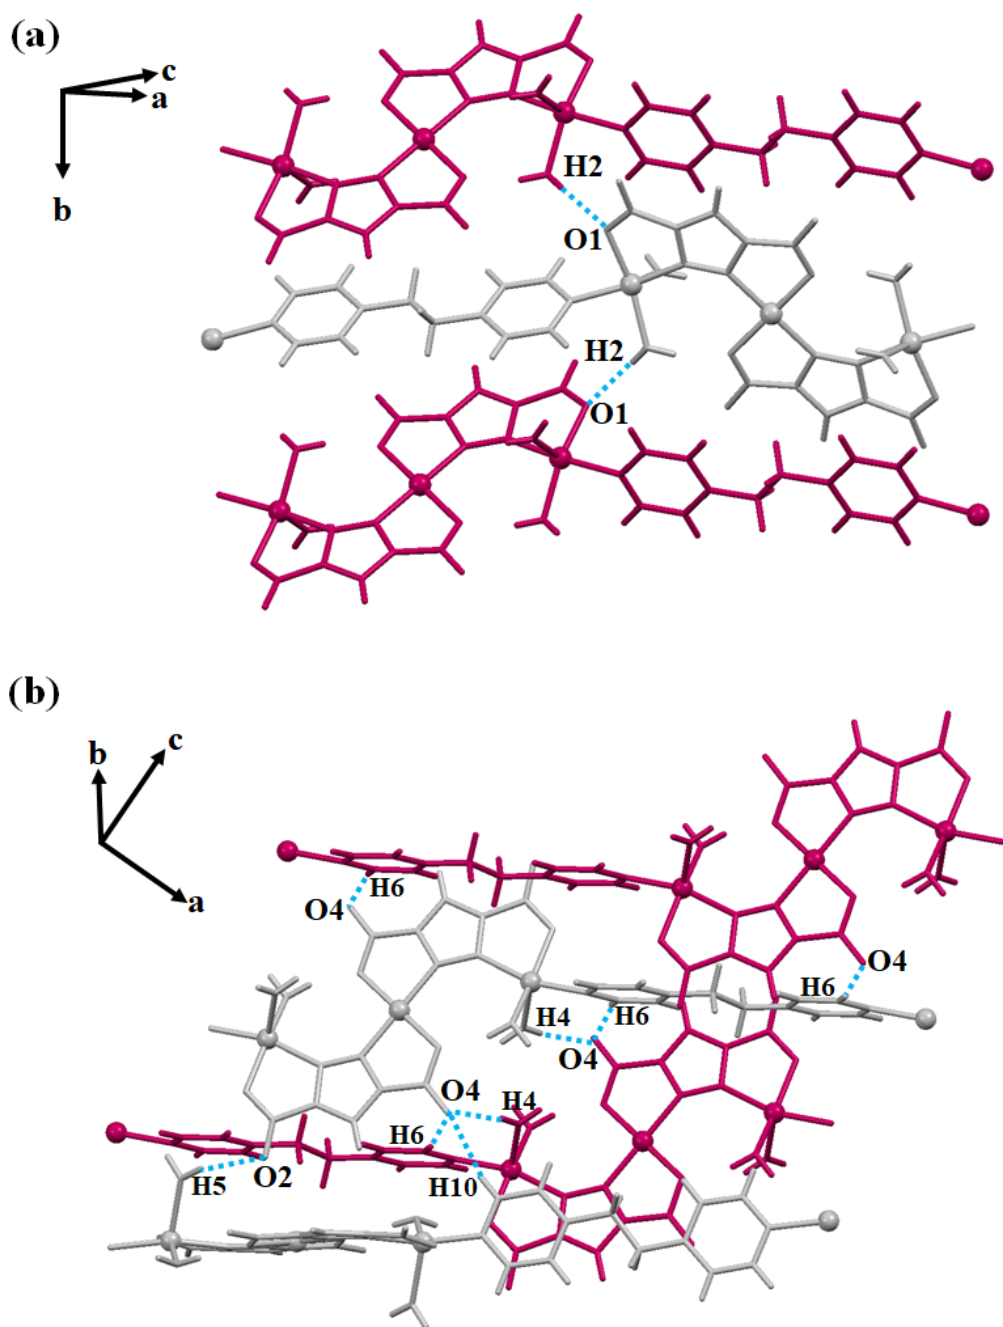

**Figure S11.** 3D supramolecular structure of **3** built by various interchain hydrogen bonding interactions.

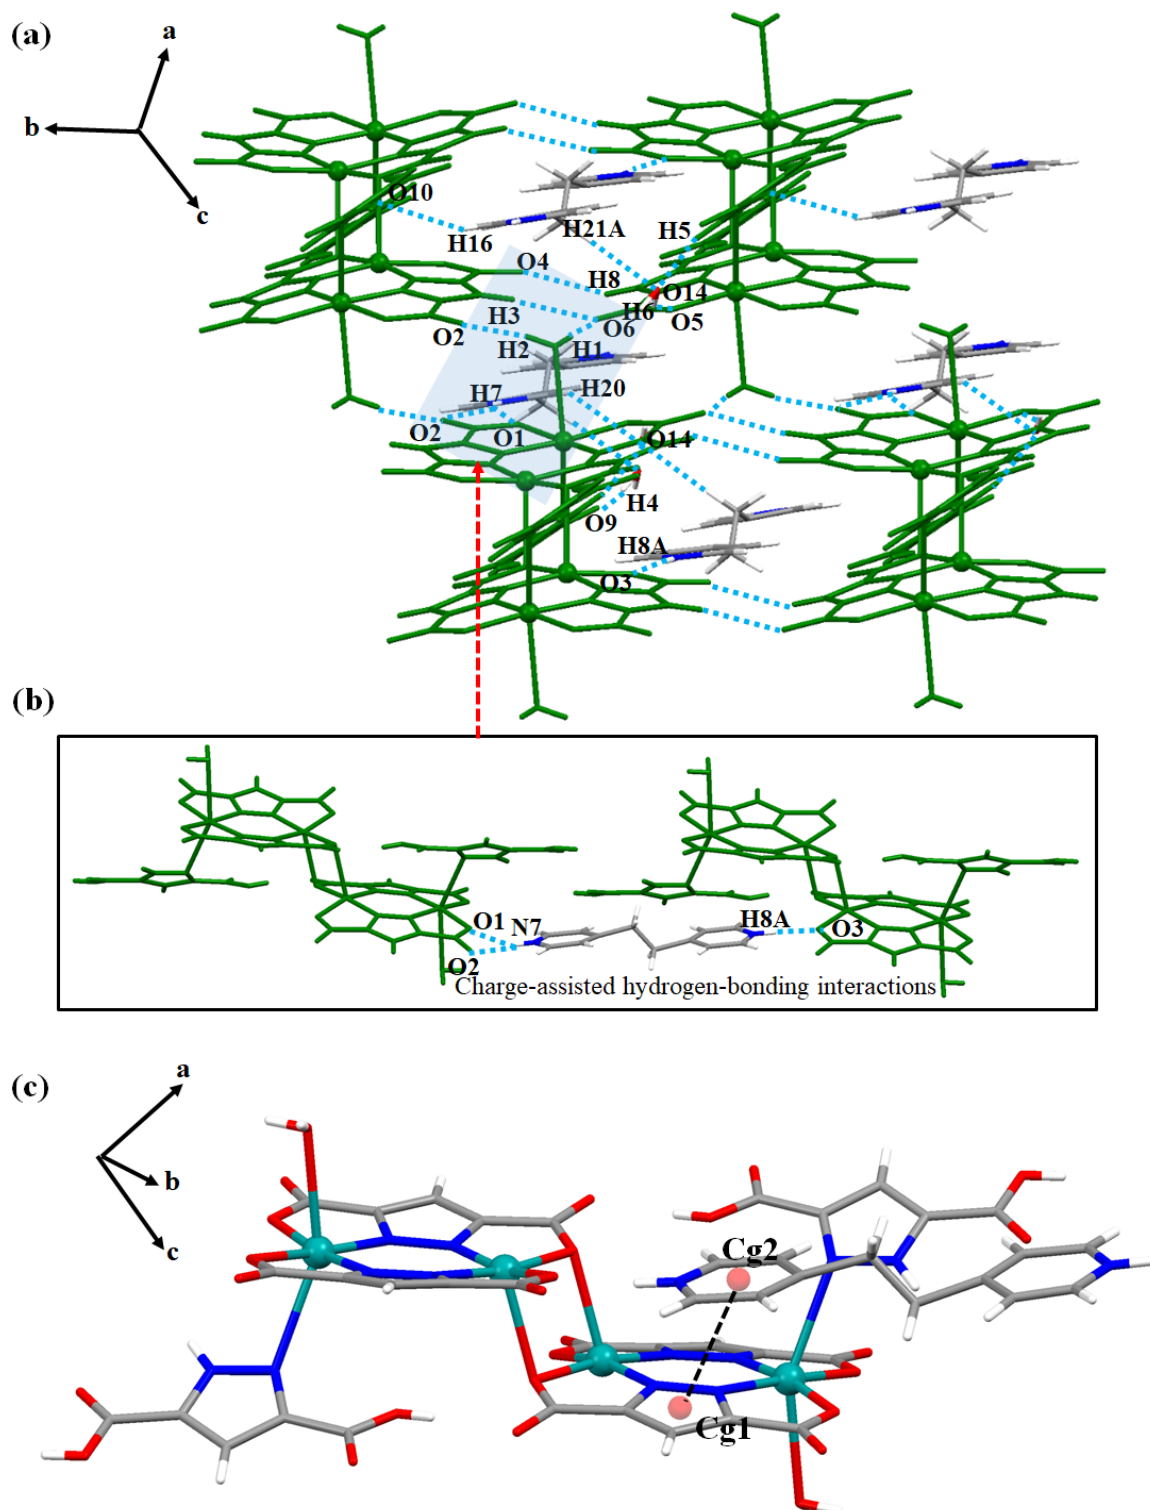

**Figure S12.** (a) 3D packing diagram of **4** built by hydrogen bonding interactions (b) the charge-assisted hydrogen-bonding interactions between anionic Cu(II) tetramer and H<sub>2</sub>bpa<sup>2+</sup> and (c)  $\pi$ - $\pi$  stacking interactions.

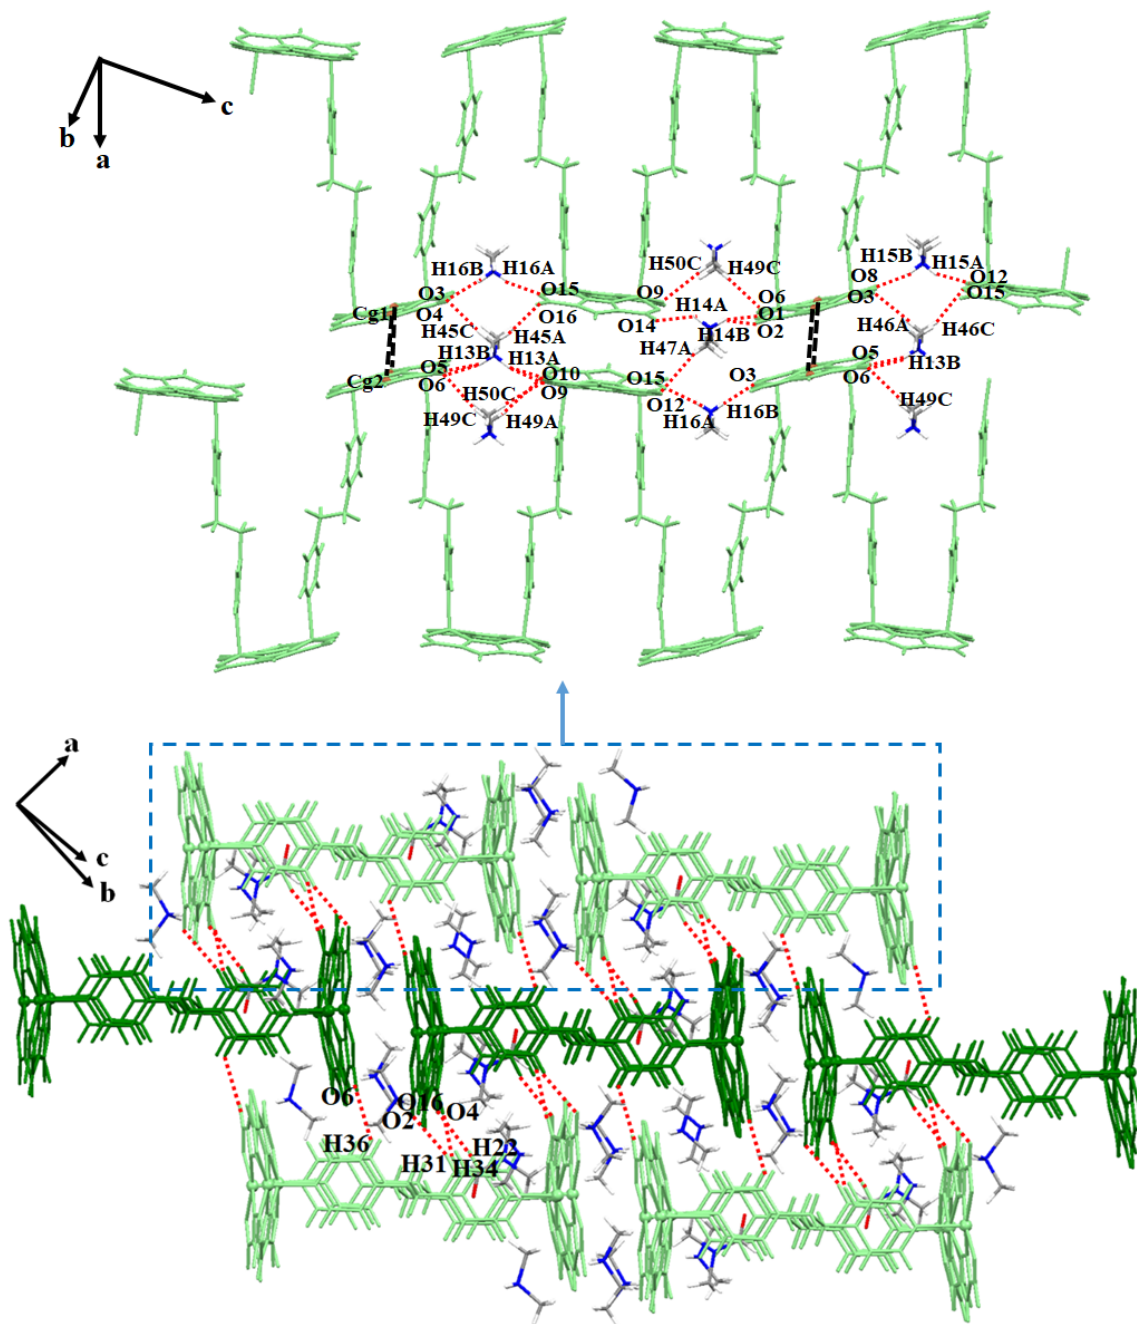

**Figure S13.** 3D supramolecular structure of **5** built by various interchain hydrogen bonding interactions and  $\pi$ - $\pi$  stacking interactions.

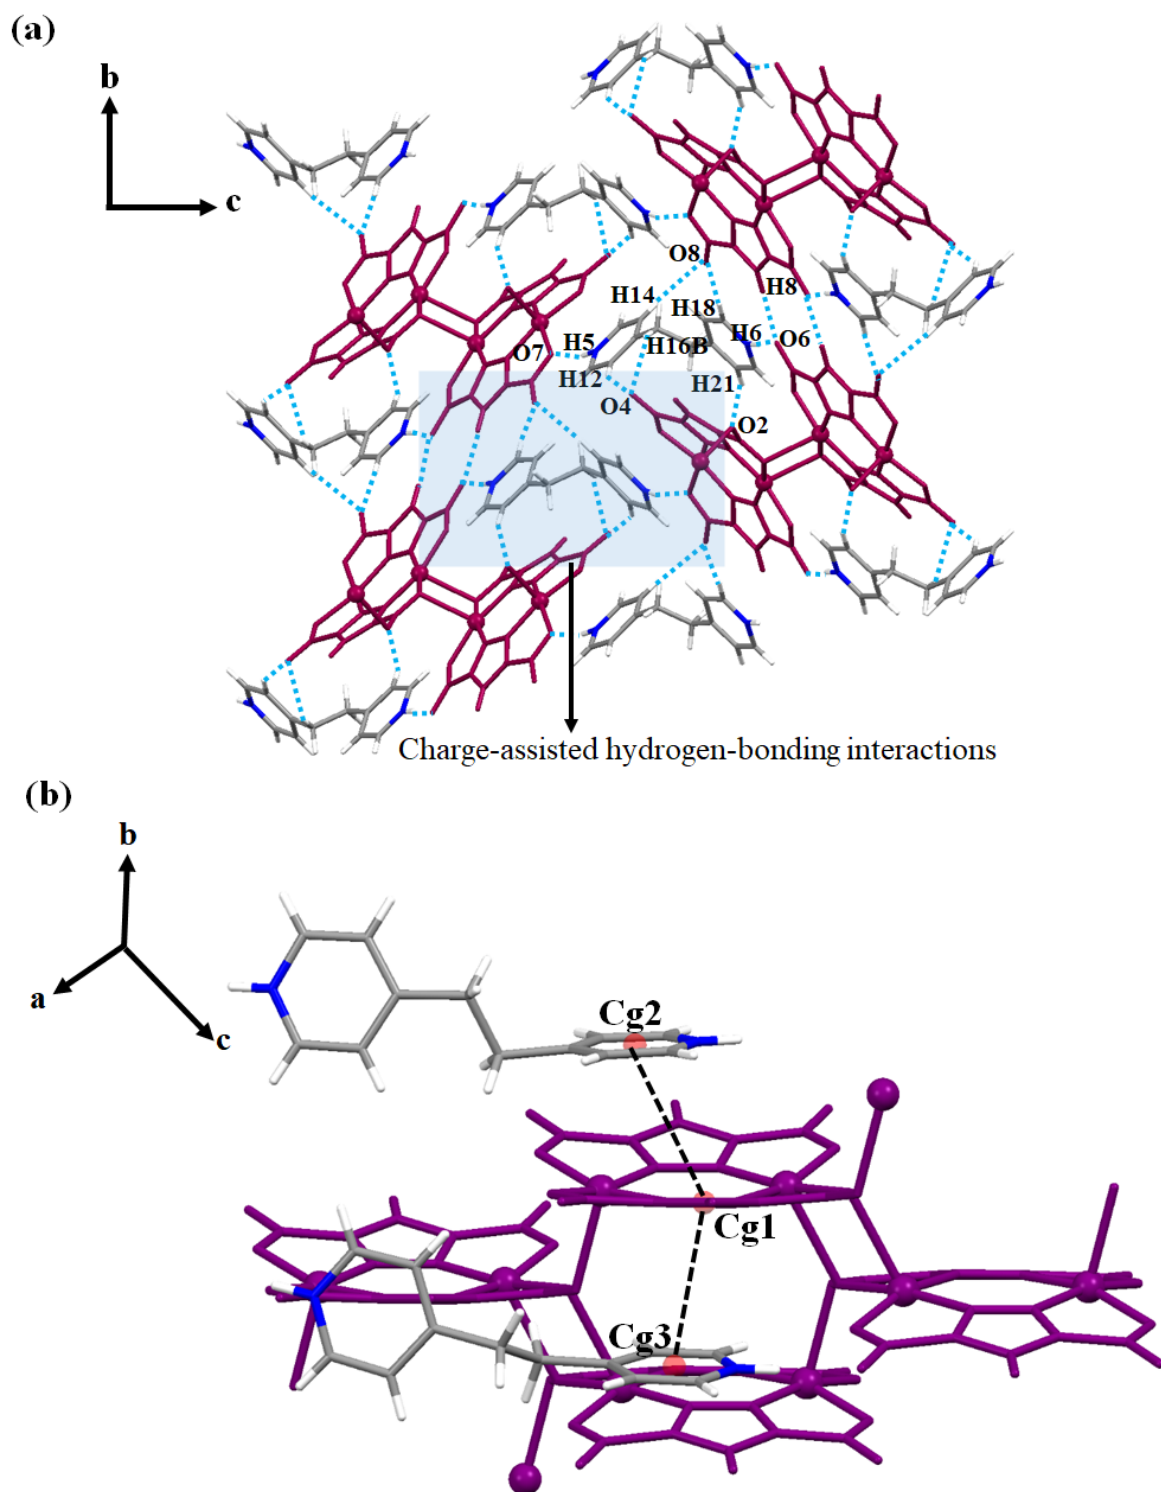

**Figure S14.** 3D supramolecular structure of **6** built by various interchain hydrogen bonding interactions and  $\pi$ - $\pi$  stacking interactions.

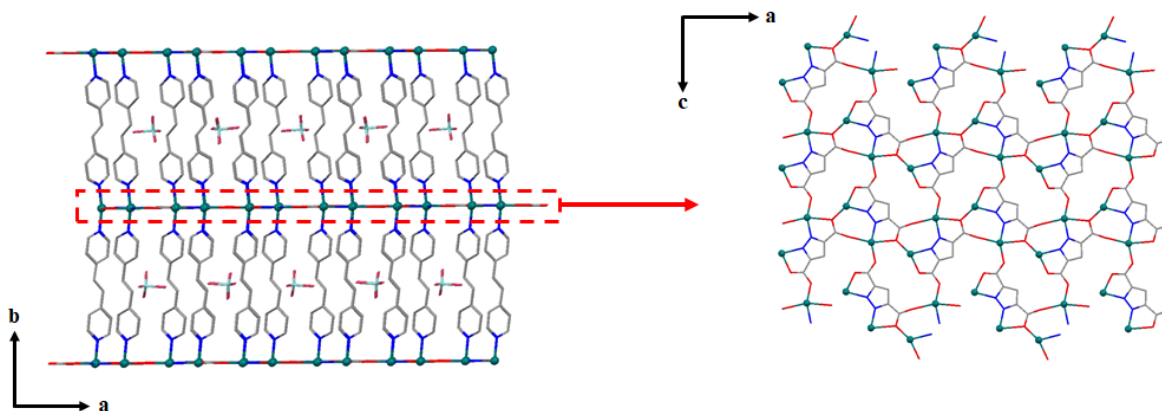

**Figure S15.** A cationic 3D pillar-layer coordination framework stabilized by lattice  $\text{BF}_4^-$  anion of **7**. (F. Klongdee, J. Boonmak and S. Youngme, *Dalton Trans.*, 2017, **46**, 4806-4815.)

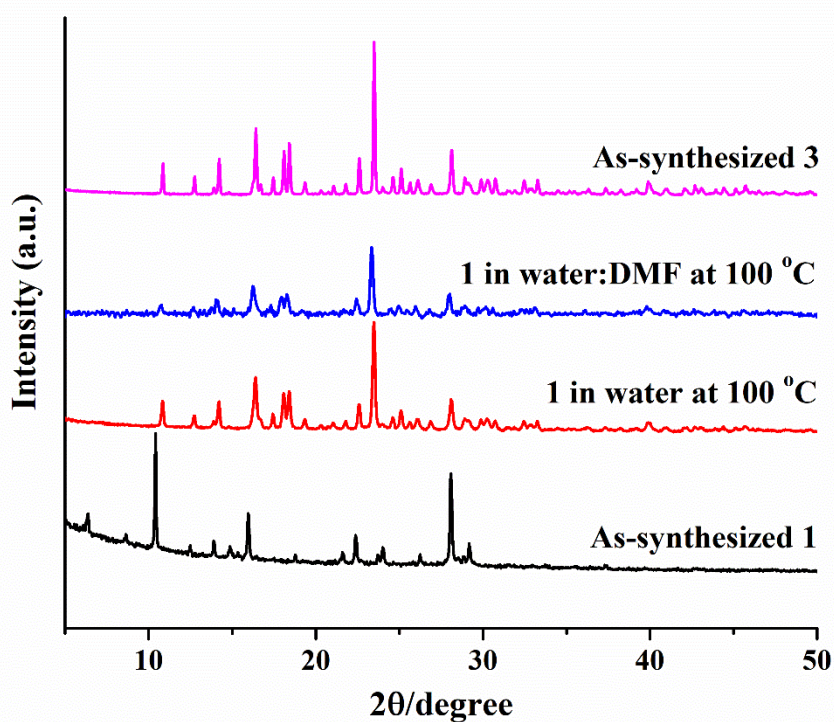

**Figure S16.** PXRD patterns of structural transformation of **1** in water and water:DMF media at 100 °C.



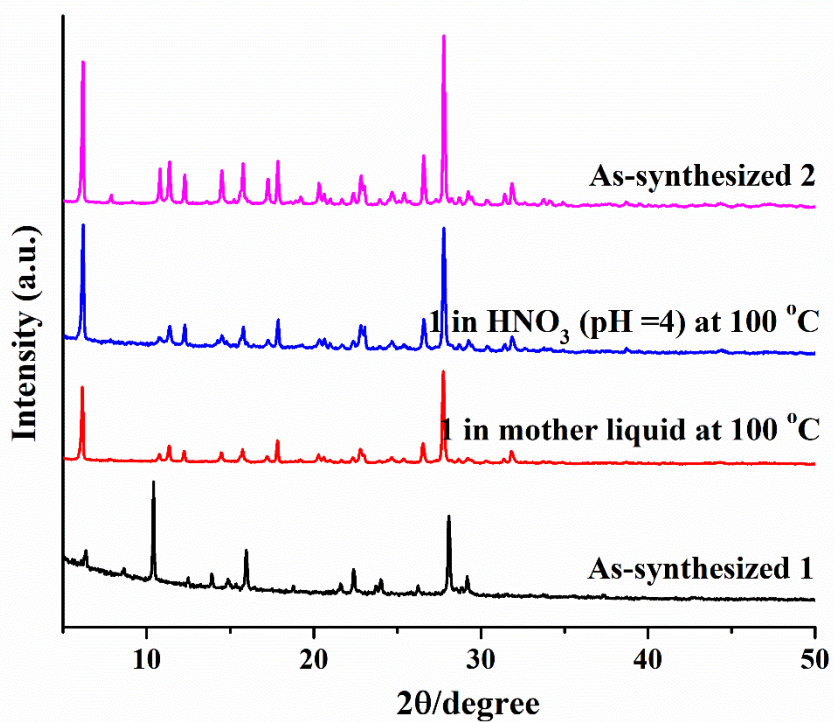

**Figure S17.** PXRD patterns of structural transformation of **1** in mother liquid and aqueous solution of HNO<sub>3</sub> (pH = 4) at 100 °C.

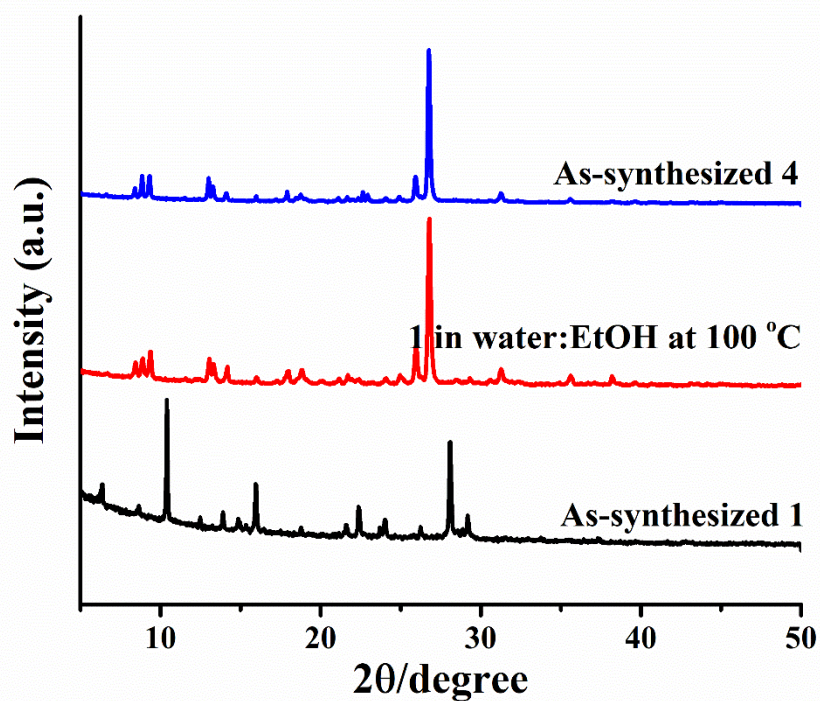

**Figure S18.** PXRD patterns of structural transformation of **1** in water:EtOH media at 100 °C.

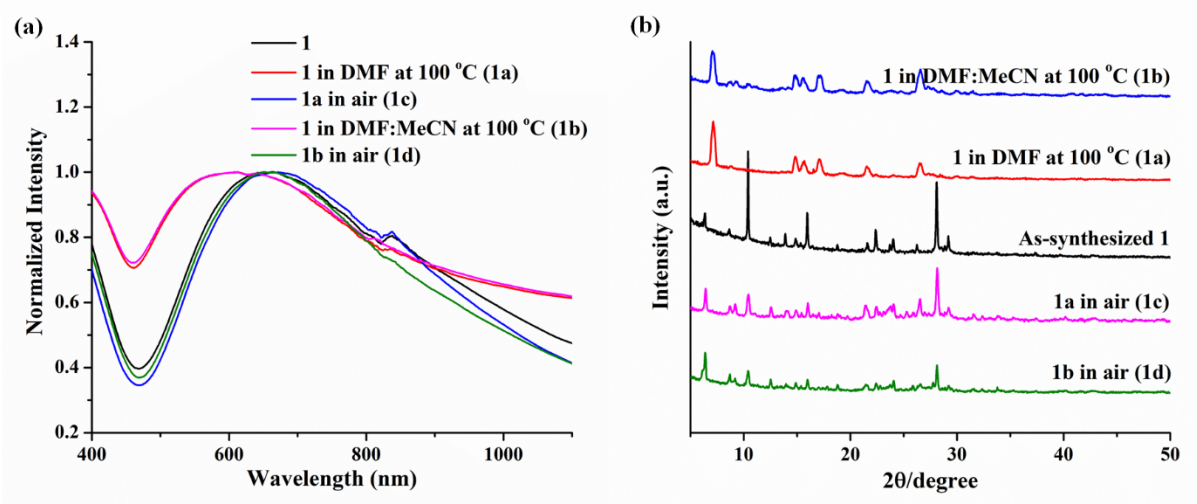

**Figure S19.** (a) The UV-vis diffuse reflectance spectra and (b) PXRD patterns of **1a-1d**.

**Table S3.** Dimensionality of complexes **1-7** and the connectivity of pzdc.

| Complex                                                                                                                                  | Dimensionality of structure | connectivity of pzdc |
|------------------------------------------------------------------------------------------------------------------------------------------|-----------------------------|----------------------|
| $[\text{Cu}_2(\text{pzdc})_2(\text{H}_2\text{O})_2](\text{H}_2\text{bpa})(\text{H}_2\text{O})_6$ ( <b>1</b> )                            | 0D                          | $\mu_2$ -pzdc        |
| $[\text{Cu}_2(\text{pzdc})_2(\text{H}_2\text{O})_2](\text{H}_2\text{bpa})(\text{H}_2\text{O})_4$ ( <b>2</b> )                            | 0D                          | $\mu_2$ -pzdc        |
| $[\text{Cu}_3(\text{pzdc})_2(\text{H}_2\text{O})_4(\text{bpa})]_n$ ( <b>3</b> )                                                          | 1D                          | $\mu_2$ -pzdc        |
| $[\text{Cu}_4(\text{pzdc})_4(\text{H}_3\text{pzdc})_2(\text{H}_2\text{O})_2](\text{H}_2\text{bpa})_2(\text{H}_2\text{O})_2$ ( <b>4</b> ) | 0D                          | $\mu_3$ -pzdc        |
| $\{[\text{Cu}_4(\text{pzdc})_4(\text{bpa})_2](\text{DMF})(\text{NH}_2(\text{CH}_3)_2)_4\}_n$ ( <b>5</b> )                                | 1D                          | $\mu_2$ -pzdc        |
| $\{[\text{Cu}_2(\text{pzdc})_2](\text{H}_2\text{bpa})\}_n$ ( <b>6</b> )                                                                  | 1D                          | $\mu_4$ -pzdc        |
| $\{[\text{Cu}_2(\text{pzdc})(\text{bpa})_2](\text{BF}_4)\}_n$ ( <b>7</b> )                                                               | 3D                          | $\mu_5$ -pzdc        |

**Table S4.** The pH values of mother liquids for **1-7** at room temperature and 100 °C.

| solvents in mother liquid of complex       | pH value         |        |
|--------------------------------------------|------------------|--------|
|                                            | room temperature | 100 °C |
| complex <b>1</b><br>(water)                | ~4               | -      |
| complex <b>2</b><br>(water)                | ~4               | ~4     |
| complex <b>3</b><br>(water:DMF (4.5:4.5))  | ~4               | ~5     |
| complex <b>4</b><br>(water:EtOH (4.5:4.5)) | ~4               | ~4     |
| complex <b>5</b><br>(DMF)                  | ~3               | ~6     |
| complex <b>6</b><br>(DMF:MeCN (6:3))       | ~3               | ~6     |
| complex <b>7</b><br>(EtOH or MeCN)         | ~2/~3            | ~2     |
